# Supplementary material for: Chemical, Cytotoxic, and Anti-Inflammatory Assessment of Honey Bee Venom from Apis mellifera intermissa
Source: MDPI journal article supplement (doi:10.3390/antibiotics10121514), 2021-12-10
Supplement: s1 [file s1]

**Table S1.** One-way analysis of variances (ANOVA) for HBV chemical characterization and biological activities outputs ( $n = 5$ ).

| Variables                                                       | Factor-Regions | Mean  | SD    | F(2,12) | p      |
|-----------------------------------------------------------------|----------------|-------|-------|---------|--------|
| In vitro cytotoxic activity (GI <sub>50</sub> in µg/mL)         |                |       |       |         |        |
| HepG2                                                           | NE             | 3.87  | 1.12  | 3.609   | 0.059  |
|                                                                 | C              | 3.56  | 0.88  |         |        |
|                                                                 | S              | 7.36  | 4.05  |         |        |
| NCI-H460                                                        | NE             | 6.93  | 2.37  | 2.960   | 0.090  |
|                                                                 | C              | 7.15  | 1.74  |         |        |
|                                                                 | S              | 10.96 | 4.16  |         |        |
| HeLa                                                            | NE             | 3.67  | 0.99  | 3.792   | 0.053  |
|                                                                 | C              | 4.29  | 0.91  |         |        |
|                                                                 | S              | 6.15  | 2.17  |         |        |
| MCF-7                                                           | NE             | 4.03  | 0.81  | 5.252   | 0.023* |
|                                                                 | C              | 5.73  | 1.12  |         |        |
|                                                                 | S              | 8.11  | 3.16  |         |        |
| MM127                                                           | NE             | 3.44  | 0.79  | 5.126   | 0.025* |
|                                                                 | C              | 4.45  | 0.66  |         |        |
|                                                                 | S              | 5.89  | 1.83  |         |        |
| PLP2                                                            | NE             | 13.85 | 8.64  | 0.982   | 0.40   |
|                                                                 | C              | 13.79 | 1.58  |         |        |
|                                                                 | S              | 19.95 | 10.68 |         |        |
| Anti-inflammatory activity (IC <sub>50</sub> in µg/mL)          |                |       |       |         |        |
| RAW264.7                                                        | NE             | 4.98  | 0.72  | 6.673   | 0.01*  |
|                                                                 | C              | 6.83  | 0.92  |         |        |
|                                                                 | S              | 10.74 | 4.24  |         |        |
| Chemical characterization by LC-DAD-ESI/MS <sup>a</sup> (µg/mL) |                |       |       |         |        |
| Apamin                                                          | NE             | 2.05  | 0.14  | 1.137   | 0.35   |
|                                                                 | C              | 1.99  | 0.09  |         |        |
|                                                                 | S              | 1.80  | 0.43  |         |        |
| PLA2                                                            | NE             | 7.66  | 1.13  | 4.025   | 0.046* |
|                                                                 | C              | 6.17  | 1.54  |         |        |
|                                                                 | S              | 5.14  | 1.50  |         |        |
| Melittin                                                        | NE             | 71.71 | 5.06  | 0.561   | 0.585  |
|                                                                 | C              | 72.53 | 1.70  |         |        |
|                                                                 | S              | 71.68 | 8.60  |         |        |
| Metal content                                                   |                |       |       |         |        |
| Ca (mg/g)                                                       | NE             | 1.90  | 0.83  | 8.42    | 0.00*  |
|                                                                 | C              | 2.96  | 0.97  |         |        |
|                                                                 | S              | 1.01  | 0.22  |         |        |
| Zn (mg/g)                                                       | NE             | 1.14  | 0.15  | 3.63    | 0.05*  |
|                                                                 | C              | 1.27  | 0.20  |         |        |
|                                                                 | S              | 1.01  | 0.06  |         |        |
| K (mg/g)                                                        | NE             | 2.87  | 0.51  | 6.93    | 0.01*  |
|                                                                 | C              | 2.38  | 0.67  |         |        |
|                                                                 | S              | 1.69  | 0.16  |         |        |
| Na (mg/g)                                                       | NE             | 1.34  | 0.22  | 6.52    | 0.01*  |
|                                                                 | C              | 1.43  | 0.22  |         |        |
|                                                                 | S              | 0.82  | 0.05  |         |        |
| Mg (mg/g)                                                       | NE             | 0.43  | 0.11  | 4.82    | 0.02*  |
|                                                                 | C              | 0.43  | 0.12  |         |        |
|                                                                 | S              | 0.27  | 0.02  |         |        |
| Pb (µg/g)                                                       | NE             | 7.19  | 1.82  | 5.64    | 0.01*  |
|                                                                 | C              | 4.27  | 0.69  |         |        |
|                                                                 | S              | 4.59  | 1.73  |         |        |

\*Significant differences

**Table S2.** Geographic coordinates of the apiaries used for sample collection

| <b>Samples</b> | <b>Coordinates</b>       |
|----------------|--------------------------|
| <b>NE1</b>     | 34°00'01.5"N 2°00'48.5"W |
| <b>NE2</b>     | 34°19'55.7"N 2°07'48.0"W |
| <b>NE3</b>     | 34°02'40.4"N 1°50'55.7"W |
| <b>NE4</b>     | 34°47'52.7"N 2°30'08.3"W |
| <b>NE5</b>     | 34°59'48.0"N 2°23'35.7"W |
| <b>C1</b>      | 33°52'15.1"N 6°21'04.4"W |
| <b>C2</b>      | 33°53'48.3"N 6°17'54.8"W |
| <b>C3</b>      | 33°54'18.6"N 6°01'38.6"W |
| <b>C4</b>      | 32°32'05.7"N 6°22'31.5"W |
| <b>C5</b>      | 32°08'38.1"N 6°31'30.5"W |
| <b>S1</b>      | 30°37'37.3"N 5°27'17.6"W |
| <b>S2</b>      | 29°45'57.9"N 7°59'22.0"W |
| <b>S3</b>      | 29°39'58.2"N 7°58'55.6"W |
| <b>S4</b>      | 30°25'13.2"N 5°53'03.2"W |
| <b>S5</b>      | 30°17'30.2"N 5°48'41.5"W |

NE – northeast; C – center; S – Southern Morocco
